# Supplementary material
Source: Springer Nature journal article supplement (https://www.springermedizin.de/resource/supplementary/13256_2011_2036_MOESM5_ESM.pdf/9649736)

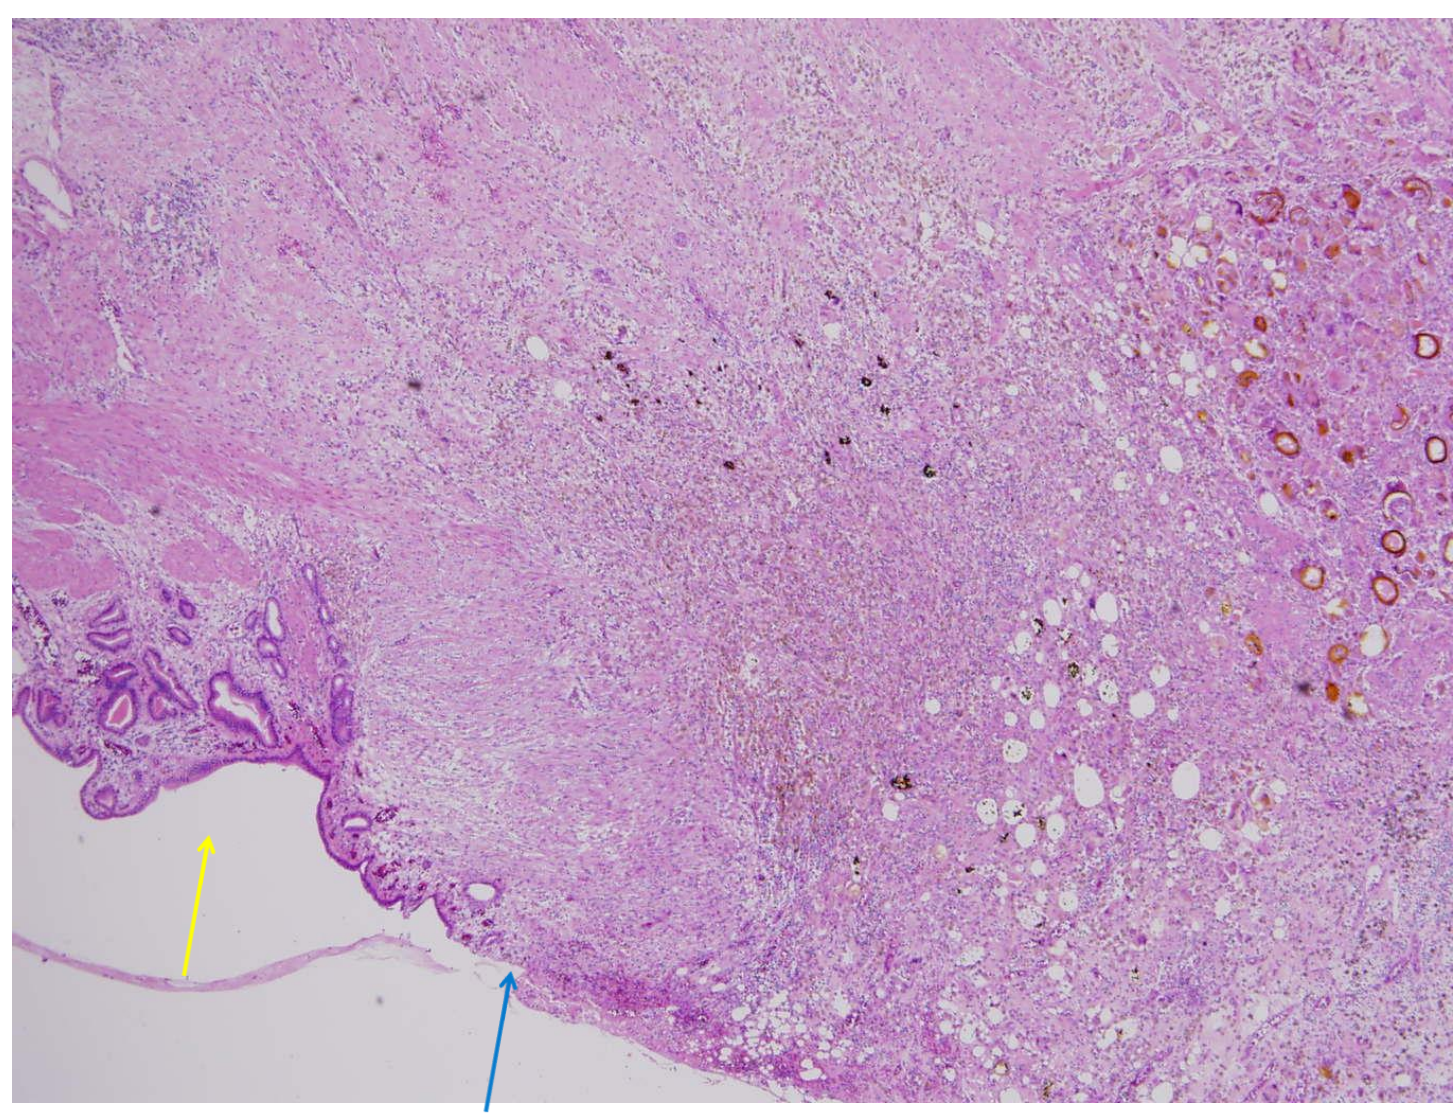

Supplement: MOESM5 [file 9649736]
